# Supplementary material
Source: PubMed Central journal article supplement (PMC6277155)
Supplement: 10.1194_M085209_jlr.M085209-1.pdf [file 10.1194_M085209_jlr.M085209-1.pdf]

## SUPPLEMENTAL INFORMATION:

### **INCREASED FGF21 IN BROWN ADIPOSE TISSUE OF TYROSINE HYDROXYLASE HETEROZYGOUS MICE: IMPLICATIONS FOR COLD ADAPTATION**

Patricia Vázquez<sup>1,2,3\*</sup>, Catalina Hernández-Sánchez<sup>2,3</sup>, Carmen Escalona-Garrido<sup>1,3</sup>, Laura Pereira<sup>3,4</sup>, Cristina Contreras<sup>5</sup>, Miguel López<sup>6,7</sup>, Jesús Balsinde<sup>3,4</sup>, Flora de Pablo<sup>2,3</sup> and Ángela M. Valverde<sup>1,3\*</sup>.

<sup>1</sup>Alberto Sols Biomedical Research Institute (IIBm) (CSIC/UAM), 28029 Madrid, Spain.

<sup>2</sup>Department of Molecular Biomedicine, Centro de Investigaciones Biológicas (CSIC), 28040 Madrid, Spain.

<sup>3</sup>Centro de Investigación Biomédica en Red de Diabetes y Enfermedades Metabólicas (CIBERdem), ISCIII, 28029 Madrid, Spain.

<sup>4</sup>Instituto de Biología y Genética Molecular, Consejo Superior de Investigaciones Científicas (CSIC), Universidad de Valladolid. 47003 Valladolid, Spain.

<sup>5</sup>Physiology Department, Pharmacy School, Complutense University of Madrid, 28040, Madrid, Spain.

<sup>6</sup>NeurObesity Group, Department of Physiology, CIMUS , University of Santiago de Compostela, -Instituto de Investigación Sanitaria , Santiago de Compostela, Spain.

<sup>7</sup>CIBER Fisiopatología de la Obesidad y Nutrición (CIBERObn) , Santiago de Compostela , Spain.

## Supplemental Fig. S1

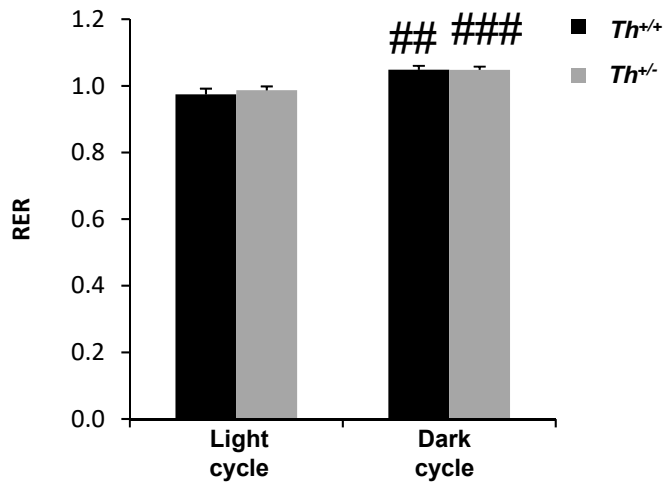

**Supplemental Fig. S1. RER analysis at thermoneutrality conditions.** Quantification of RER in both genotypes during day and night, at 29°C. Data are mean  $\pm$  SEM. n= 7-9/group. Mann-Whitney *U* test was used. ##p<0.01, ###p<0.001 between each genotype at dark cycle and light cycle.

## A Supplemental Fig. S2 B

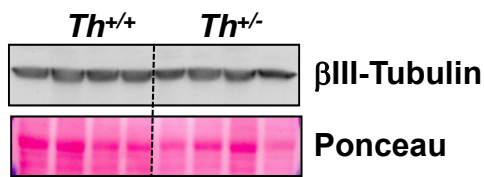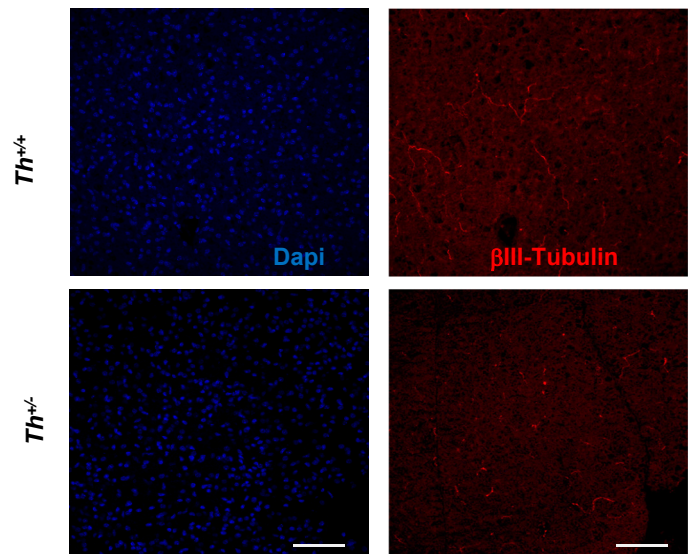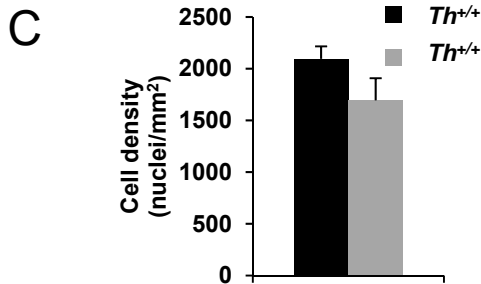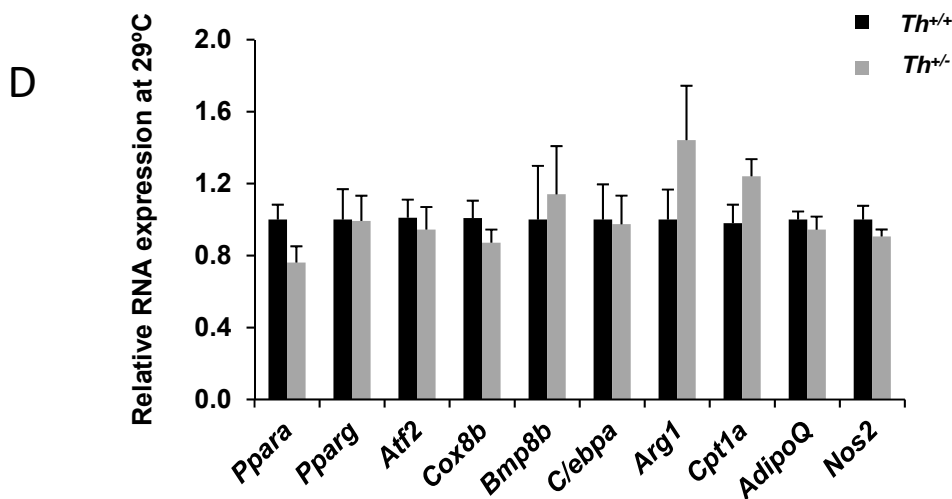

### Supplemental Fig. S2. Characterization of BAT in thermoneutrality conditions.

A) Representative western blot of BAT extracts using  $\beta$ -III tubulin antibody and Ponceau staining as a loading control. The staining of  $\beta$ -III tubulin fibers is shown in red. B) Representative immunohistochemistry of BAT in paraffin sections. Nuclei staining with DAPI is shown in blue. C) Quantification of nuclei/area in BAT sections stained with H&E. D) The graphs represent the relative expression of different BAT-related genes at thermoneutral conditions. All data were relative to RNA levels of  $Th^{+/+}$  mice at 29°C. Data are mean  $\pm$  SEM.  $n = 5-7$ /group in C and  $n = 4-11$ /group in D. Mann-Whitney  $U$  test was used. Bar scale 75 $\mu$ m.

## Supplemental Fig. S3

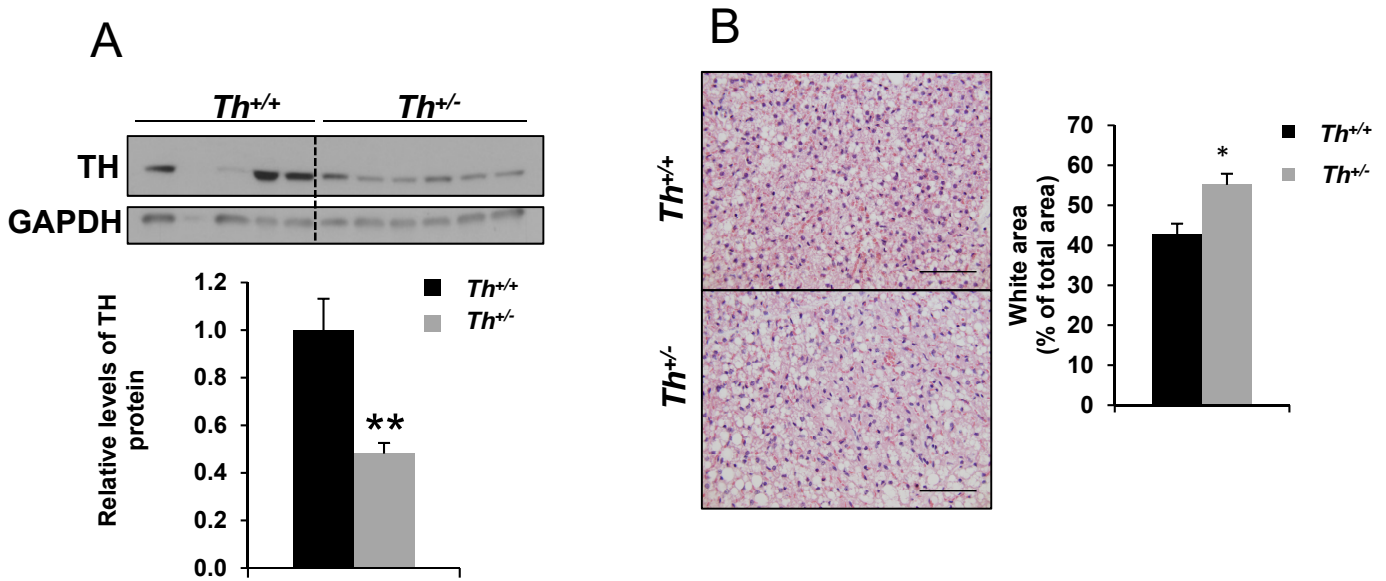

### **Supplemental Fig. S3. Characterization of BAT of $Th^{+/+}$ and $Th^{+/-}$ mice after cold exposure.**

A) Western blot analysis and quantification of tyrosine hydroxylase (TH) in BAT lysates after cold exposure using GAPDH as a loading control. B) Representative H&E staining and quantification of white area of BAT sections of  $Th^{+/+}$  and  $Th^{+/-}$  mice after cold exposure. Data are mean  $\pm$  SEM.  $n=6-10$ /group in A and  $n=4-5$ /group in B. Mann-Whitney  $U$  test was used. \*\* $p<0.01$  between  $Th^{+/+}$  mice and  $Th^{+/-}$  mice group. # $p<0.05$ , ## $p<0.01$ , ### $p<0.001$  between each genotype at 4°C and 29°C group.

## Supplemental Fig. S4

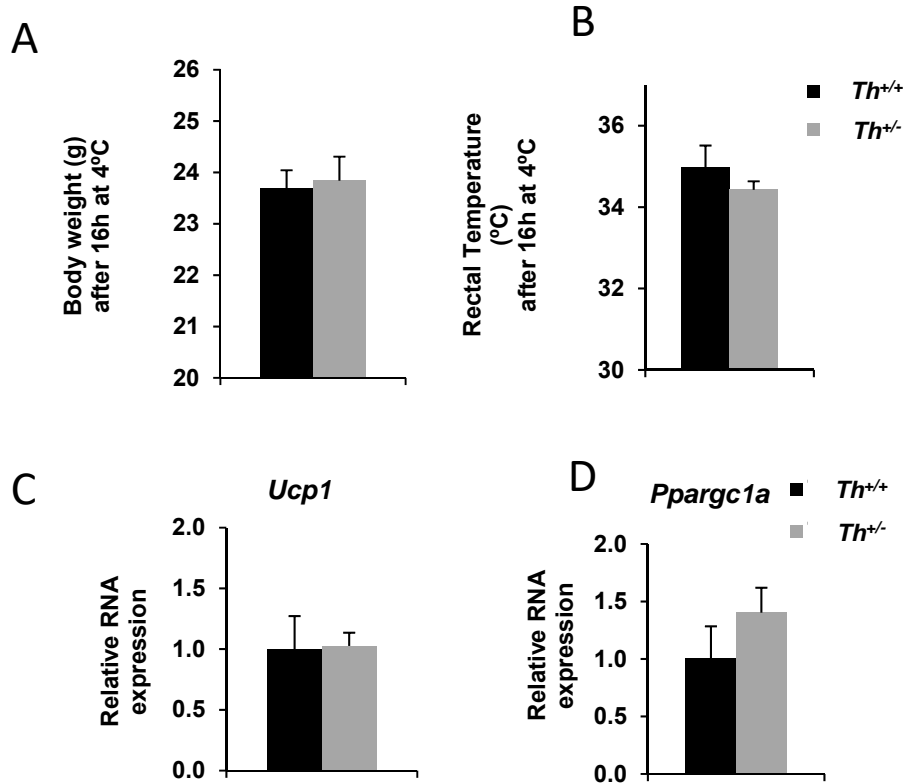

### **Supplemental Fig. S4. Characterization of BAT of *Th*<sup>+/+</sup> and *Th*<sup>+/-</sup> mice after 16 h of cold exposure.**

A) Body weight and B) Rectal temperature were measured after 16 h of cold exposure. C-D) The graphs represent the relative expression of *Ucp1* and *Ppargc1a*, respectively, by quantitative RT-PCR analysis in BAT after 16 h of cold exposure. Data were normalized with *Tbp* RNA expression. Data are mean ± SEM. n= 4-5/group in A and B, n= 5/group in C and D. Mann-Whitney *U* test was used.

## Supplemental Fig. S5

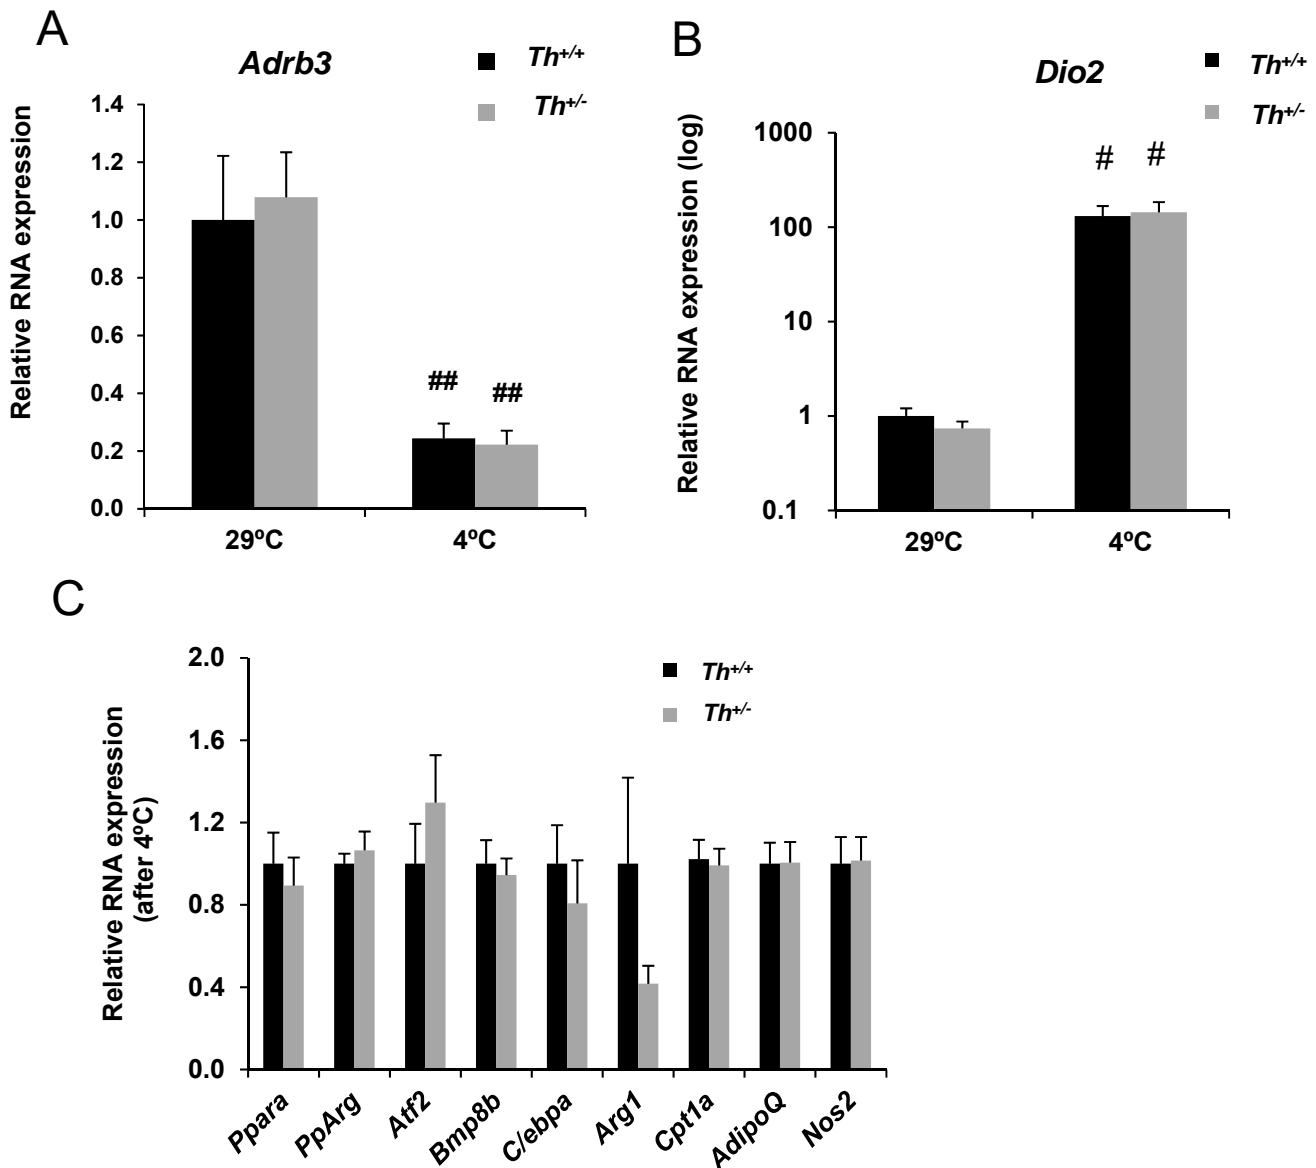

**Supplemental Fig. S5. Expression of different genes in BAT of *Th*<sup>+/+</sup> and *Th*<sup>+/-</sup> mice after cold exposure.** A,B) The graphs represent the relative expression of  $\beta$ -3-adrenergic receptors (*Adrb3*) and *Dio2* respectively by quantitative RT-PCR analysis in BAT. In A and B data were relative to RNA levels of *Th*<sup>+/+</sup> mice at 29°C. C) The graphs represent the relative expression of several BAT-related genes. Data were relative to RNA levels of *Th*<sup>+/+</sup> mice at 4°C. All data were normalized with *Tbp* or *Rlpb0* RNA expression. Data are mean  $\pm$  SEM. n= 4-5/group in A and B and n=4-11 in C. Mann-Whitney *U* test was used. #p<0.05, ##p<0.01, between each genotype at 4°C and 29°C groups.

## Supplemental Fig. S6

A

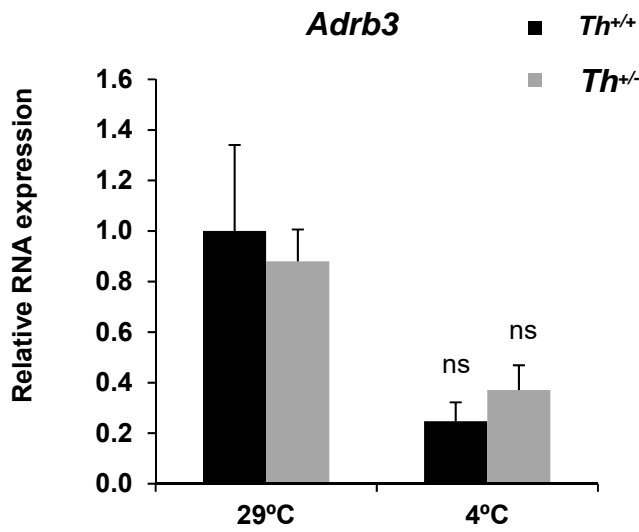

B

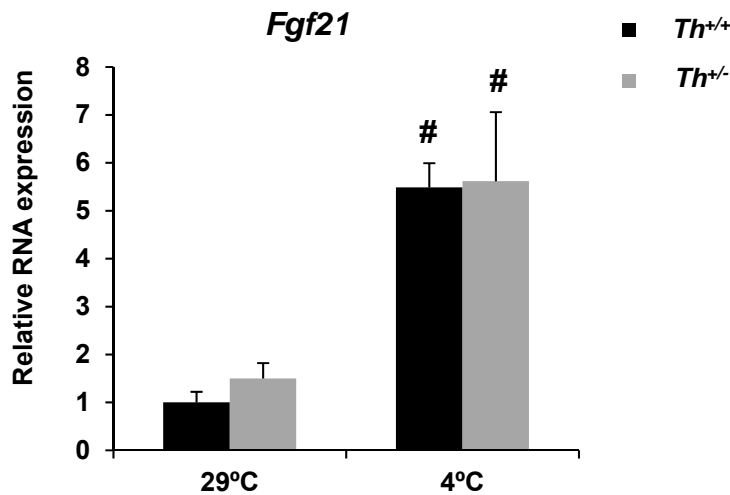

**Supplemental Fig. S6. Analysis of the expression of  $\beta$ -3-adrenergic receptors and *Fgf21* in iWAT of *Th*<sup>+/+</sup> and *Th*<sup>+/-</sup> mice.** A, B) The graphs represent the relative RNA expression of  $\beta$ -3-adrenergic receptors (*Adrb3*) and *Fgf21* by quantitative RT-PCR analysis in iWAT. The data were normalized with *Tbp* RNA expression. All data were relative to RNA levels of *Th*<sup>+/+</sup> mice at 29°C. Data are mean  $\pm$  SEM. n= 3-5/group. Mann–Whitney *U* test was used. #p<0.05 between each genotype at 4°C and 29°C groups.

## Supplemental Fig. S7

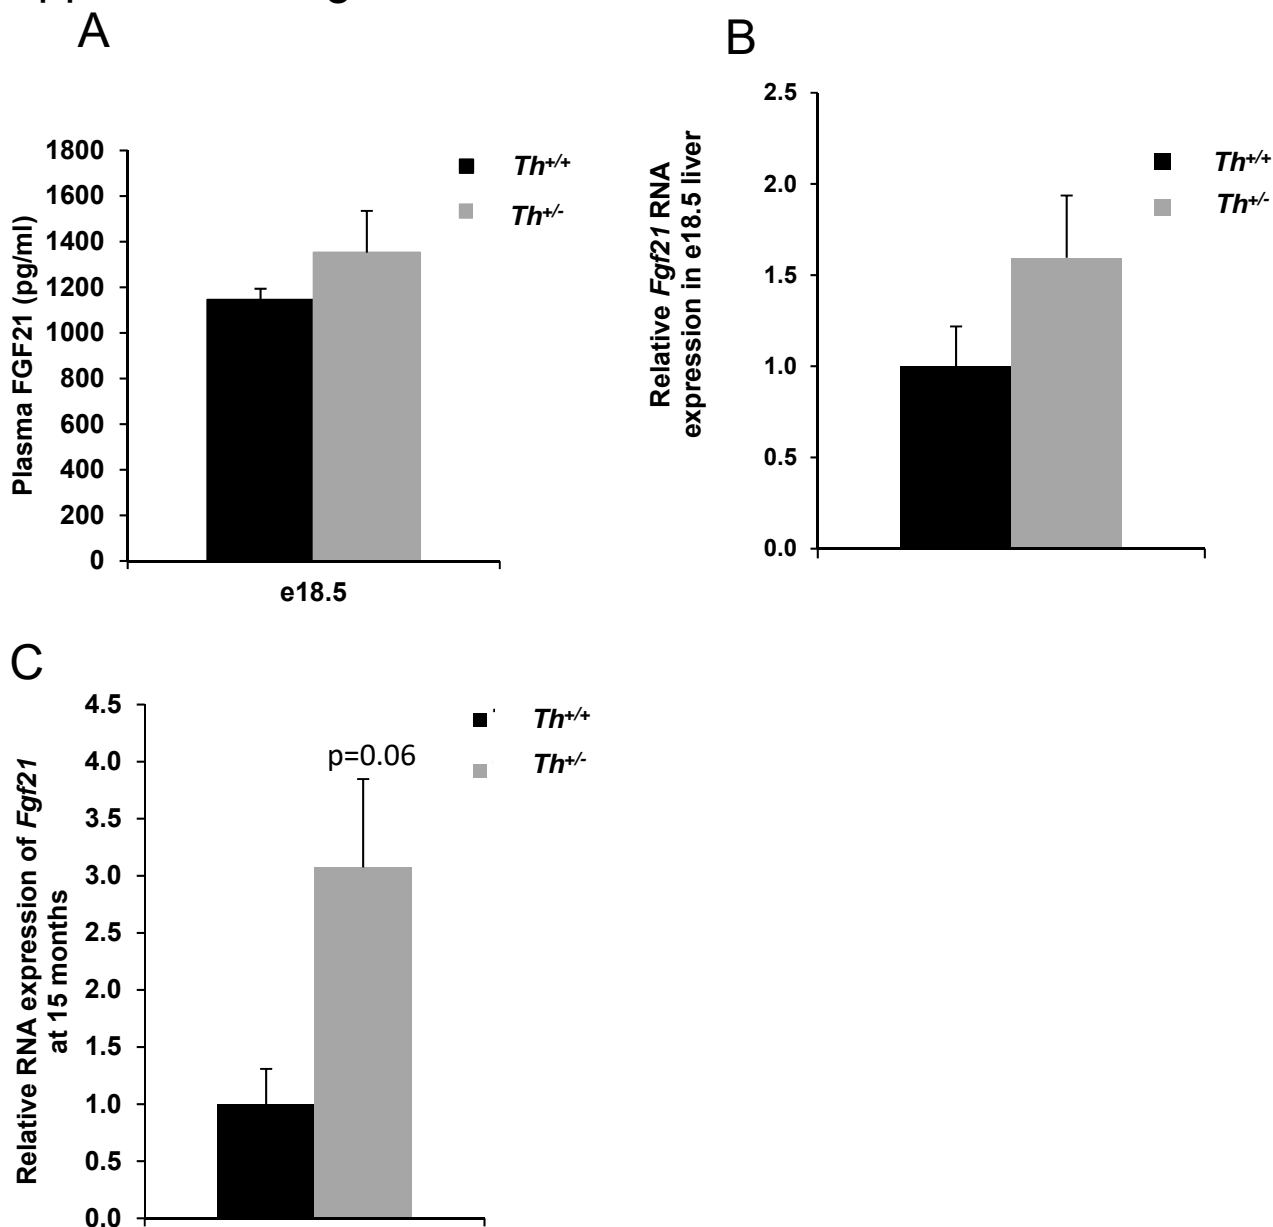

**Supplemental Fig S7. FGF21 was increased in embryonic and aged *Th*<sup>+/-</sup> mice in basal conditions.** A) FGF21 levels in plasma of e18.5 embryos. B-C) Relative expression of *Fgf21* by quantitative RT-PCR analysis in livers from e18.5 embryos and in BAT of mice at 15 months of age. The data were normalized with *Tbp* RNA expression. All data were relative to RNA levels of *Th*<sup>+/+</sup> mice. Data are mean  $\pm$  SEM. n=4/group in A and n= 5-6/group in B and C. Mann–Whitney *U* test was used.
